# Supplementary material for: Health and well-being in small island communities: a cross-sectional study in the Solomon Islands
Source: HighWire-hosted journal article supplement (doi:10.1136/bmjopen-2021-055106), 2021-11-01
Supplement: bmjopen-2021-055106supp002_data_supplement.pdf [file bmjopen-2021-055106supp002_data_supplement.pdf]

## Supplementary Material 2. Cross-tabulation of the Humanitarian Emergency Settings Perceived Needs Scale (HESPER)

| Question                                | Answer       | Sasamungga | Taro | Manuopo | Pairwise comparisons:<br>Holms method<br>(P <0.05) |
|-----------------------------------------|--------------|------------|------|---------|----------------------------------------------------|
| 1. Drinking water                       | No           | 89         | 86   | 82      | M > T, S                                           |
|                                         | Yes          | 24         | 28   | 52      |                                                    |
|                                         | Don't Know   |            | 1    |         |                                                    |
|                                         | Not Answered |            | 1    | 21      |                                                    |
| 2. Food                                 | No           | 101        | 106  | 81      | M > T, S                                           |
|                                         | Yes          | 12         | 9    | 52      |                                                    |
|                                         | Don't Know   |            |      | 1       |                                                    |
|                                         | Not Answered |            | 1    | 21      |                                                    |
| 3. Place to live in                     | No           | 104        | 110  | 110     | M > T                                              |
|                                         | Yes          | 9          | 4    | 23      |                                                    |
|                                         | Don't Know   |            | 1    | 1       |                                                    |
|                                         | Not Answered |            | 1    | 21      |                                                    |
| 4. Toilets                              | No           | 64         | 66   | 27      | M > T, S                                           |
|                                         | Yes          | 49         | 49   | 105     |                                                    |
|                                         | Don't Know   |            |      | 2       |                                                    |
|                                         | Not Answered |            | 1    | 21      |                                                    |
| 5. Keeping clean                        | No           | 100        | 108  | 95      | M > T, S                                           |
|                                         | Yes          | 13         | 7    | 39      |                                                    |
|                                         | Not Answered |            | 1    | 21      |                                                    |
| 6. Clothes, shoes, bedding, or blankets | No           | 104        | 106  | 88      | M > T, S                                           |
|                                         | Yes          | 9          | 6    | 46      |                                                    |
|                                         | Don't Know   |            | 3    |         |                                                    |
|                                         | Not Answered |            | 1    | 21      |                                                    |
| 7. Income or livelihood                 | No           | 91         | 88   | 27      | M > T, S                                           |
|                                         | Yes          | 22         | 27   | 104     |                                                    |
|                                         | Don't Know   |            |      | 2       |                                                    |
|                                         | Not Answered |            | 1    | 22      |                                                    |
| 8. Physical health                      | No           | 79         | 99   | 73      | M > S > T                                          |
|                                         | Yes          | 33         | 11   | 60      |                                                    |
|                                         | Don't Know   | 1          | 5    |         |                                                    |
|                                         | Not Answered |            | 1    | 22      |                                                    |
| 9. Health care                          | No           | 108        | 98   | 64      | M > T > S                                          |
|                                         | Yes          | 4          | 17   | 68      |                                                    |
|                                         | Don't Know   | 1          |      | 1       |                                                    |

|                                    |              |    |     |     |          |
|------------------------------------|--------------|----|-----|-----|----------|
|                                    | Not Answered |    | 1   | 22  |          |
| 10. Distress                       | No           | 65 | 70  | 52  | M > T, S |
|                                    | Yes          | 44 | 43  | 79  |          |
|                                    | Don't Know   | 4  | 2   | 2   |          |
|                                    | Not Answered |    | 1   | 22  |          |
| 11. Safety                         | No           | 92 | 102 | 67  | M > T, S |
|                                    | Yes          | 20 | 13  | 66  |          |
|                                    | Don't Know   | 1  |     |     |          |
|                                    | Not Answered |    | 1   | 22  |          |
| 12. Education for your children    | No           | 76 | 82  | 99  | n.s.     |
|                                    | Yes          | 7  | 16  | 26  |          |
|                                    | Don't Know   | 30 | 17  | 8   |          |
|                                    | Not Answered |    | 1   | 22  |          |
| 13. Care for family members        | No           | 80 | 86  | 88  | M > T    |
|                                    | Yes          | 26 | 20  | 43  |          |
|                                    | Don't Know   | 7  | 9   | 2   |          |
|                                    | Not Answered |    | 1   | 22  |          |
| 14. Support from others            | No           | 83 | 83  | 65  | M > S, T |
|                                    | Yes          | 27 | 27  | 68  |          |
|                                    | Don't Know   | 3  | 5   |     |          |
|                                    | Not Answered |    | 1   | 22  |          |
| 15. Separation from family members | No           | 56 | 68  | 79  | n.s.     |
|                                    | Yes          | 24 | 11  | 24  |          |
|                                    | Don't Know   | 33 | 36  | 30  |          |
|                                    | Not Answered |    | 1   | 22  |          |
| 16. Being displaced from home      | No           | 60 | 42  | 72  | n.s.     |
|                                    | Yes          | 7  | 1   | 14  |          |
|                                    | Don't Know   | 46 | 72  | 47  |          |
|                                    | Not Answered |    | 1   | 22  |          |
| 17. Information                    | No           | 44 | 17  | 21  | M > S, T |
|                                    | Yes          | 57 | 15  | 88  |          |
|                                    | Don't Know   | 12 | 83  | 16  |          |
|                                    | Not Answered |    | 1   | 30  |          |
| 18. The way aid is provided        | No           | 41 | 19  | 30  | M > S, T |
|                                    | Yes          | 50 | 21  | 101 |          |
|                                    | Don't Know   | 22 | 75  | 2   |          |
|                                    | Not Answered |    | 1   | 22  |          |
| 19. Respect                        | No           | 70 | 62  | 100 | n.s.     |
|                                    | Yes          | 39 | 34  | 33  |          |

|                                                                    |              |     |    |     |          |
|--------------------------------------------------------------------|--------------|-----|----|-----|----------|
| 19. Respect                                                        | Don't Know   | 4   | 19 |     |          |
|                                                                    | Not Answered |     | 1  | 22  |          |
| 20. Moving between places                                          | No           | 100 | 46 | 109 | n.s.     |
|                                                                    | Yes          | 4   | 5  | 14  |          |
|                                                                    | Don't Know   | 9   | 64 | 10  |          |
|                                                                    | Not Answered |     | 1  | 22  |          |
| 21. Too much free time                                             | No           | 80  | 77 | 44  | M > S, T |
|                                                                    | Yes          | 27  | 29 | 88  |          |
|                                                                    | Don't Know   | 6   | 9  | 1   |          |
|                                                                    | Not Answered |     | 1  | 22  |          |
| 22. Law and justice in your community                              | No           | 43  | 41 | 31  | M > S, T |
|                                                                    | Yes          | 54  | 57 | 100 |          |
|                                                                    | Don't Know   | 16  | 17 | 2   |          |
|                                                                    | Not Answered |     | 1  | 22  |          |
| 23. Safety or protection from violence for women in your community | No           | 43  | 59 | 43  | M > T    |
|                                                                    | Yes          | 58  | 48 | 90  |          |
|                                                                    | Don't Know   | 12  | 8  |     |          |
|                                                                    | Not Answered |     | 1  | 22  |          |
| 24. Alcohol or drug use in your community                          | No           | 8   | 17 | 5   | M > T    |
|                                                                    | Yes          | 104 | 95 | 128 |          |
|                                                                    | Don't Know   | 1   | 3  |     |          |
|                                                                    | Not Answered |     | 1  | 22  |          |
| 25. Mental illness in your community                               | No           | 69  | 63 | 77  | n.s.     |
|                                                                    | Yes          | 37  | 45 | 53  |          |
|                                                                    | Don't Know   | 7   | 7  | 3   |          |
|                                                                    | Not Answered |     | 1  | 22  |          |
| 26. Care for people in your community who are on their own         | No           | 60  | 60 | 68  | n.s.     |
|                                                                    | Yes          | 43  | 37 | 63  |          |
|                                                                    | Don't Know   | 10  | 18 | 2   |          |
|                                                                    | Not Answered |     | 1  | 22  |          |
